# Supplementary material for: BioID2 screening identifies KIAA1671 as an EPS8 proximal factor that marks sites of microvillus growth
Source: PubMed Central journal article supplement — Mol Biol Cell. 2023 Mar 7;34(4):ar31. doi: 10.1091/mbc.E22-11-0498 (PMC10092648; doi:10.1091/mbc.e22-11-0498), 2023-03-07
Supplement: mbc-34-ar31-s001.pdf [file mbc-34-ar31-s001.pdf]

Supplementary Materials  
*Molecular Biology of the Cell*  
Gaeta and Tyska

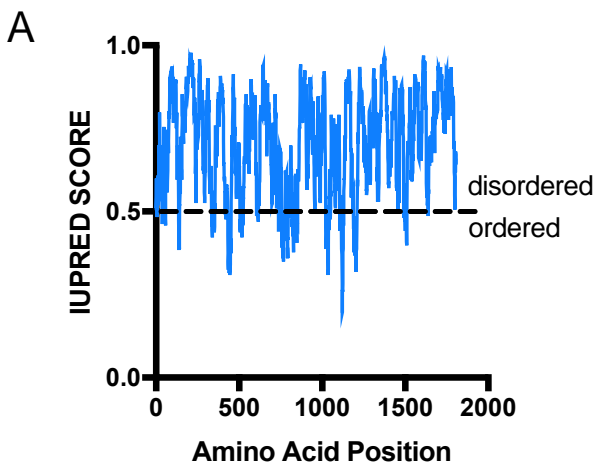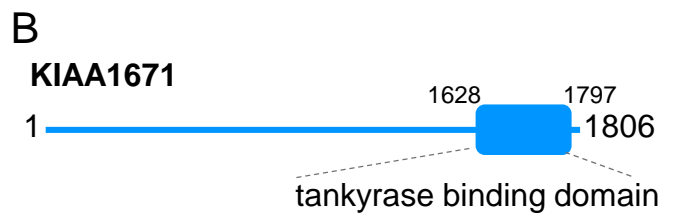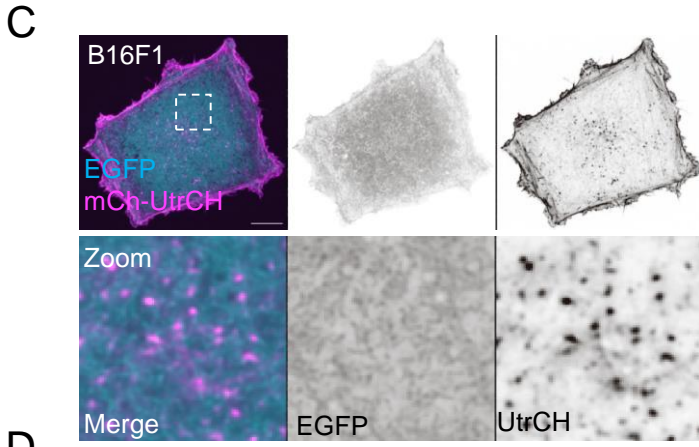

**D**

|          |      |                  |             |                 |                          |                   |
|----------|------|------------------|-------------|-----------------|--------------------------|-------------------|
| KIAA1671 | 1617 | PPDACPEKRVDDFSFI | DQTSVLDS    | SALKTRVQLSKRSRR | RAPI---SHSL              | 1663              |
| TNKS1BP1 | 1543 | PPARS            | PSQ---DFSFI | EDTEILD         | SAMYRSRANLGRKRGR         | RAPVIRPGGTL 1594  |
| KIAA1671 | 1664 | RRSRFSE          | SESRSPLEDET | DNTWFMFKD       | STEEKSPRKEESDE---EETASKA | 1710              |
| TNKS1BP1 | 1595 | GLSEAAD          | SDAH-----L  | FQDSTE          | PRASRVVPS                | SDEEVVEEPQSR 1633 |
| KIAA1671 | 1711 | ER               |             |                 |                          |                   |
| TNKS1BP1 | 1634 | TR               |             |                 |                          |                   |

identical  
similar  
not similar

**E**

|          |      |        |                    |                   |                       |                  |
|----------|------|--------|--------------------|-------------------|-----------------------|------------------|
| KIAA1671 | 1013 | PAVKQ  | GSPVEPKATFFAVTYQI  | PNTQKAKGVVLSGAESL | LEHSRKITP-            | 1060             |
| CARMIL1  | 959  | PSLRQ  | ----EKRSSGF--      | ISELPS            | EEGKK-----LEHFTKLRPKR | 992              |
| KIAA1671 | 1061 | -----P | SSPHSLTSTLVSLGHEEA | LEMAGSKNWMK       | GREHENASILKTLKP       | 1105             |
| CARMIL1  | 993  | NKKQQP | PTQAAVCAANI        | VS-----QDGEQ      | NGLMGRVDE             | EGVDEFFTKKV 1034 |
| KIAA1671 | 1106 | TDRP   | SSLGAWSLDPFN       | GRIIDVDAL         | WSHRGSE               | 1137             |
| CARMIL1  | 1035 | TKMDSK | -----KW            | STRGSE            |                       | 1048             |

identical  
similar  
not similar

CPI consensus motif: LxHxTxxRPKx6P

### **Supplemental Figure 1.**

**(A)** Prediction of sequence disorder using IUPRED2A. IUPRED scores over 0.5 predict disorder while values under 0.5 predict ordered residues. **(B)** Domain diagram of KIAA1671 highlighting its annotated tankyrase binding domain. **(C)** B16F1 melanoma cell expressing EGFP and mCherry-UtrCH. Zoom indicates region with UtrCH puncta. **(D)** EMBOSS Water local sequence alignment of human KIAA1671 (NP\_001138678.1) and human TNKS1BP1 (Accession NP\_203754.2) using a BLOSUM62 matrix. Identical residues are highlighted in magenta, similar residues are highlighted in black, and not similar amino acids are shown in light gray. **(D)** EMBOSS Water local sequence alignment of human KIAA1671 (NP\_001138678.1) and human CARMIL1 (also known as F-actin-uncapping protein LRRC16A; NP\_060110.4) using a BLOSUM62 matrix. The CARMIL annotated CPI consensus motif is highlighted in the red box. Identical residues are highlighted in magenta, similar residues are highlighted in black, and not similar amino acids are shown in light gray.
